# Supplementary material for: Real-World Effectiveness of Mix-and-Match Vaccine Regimens against SARS-CoV-2 Delta Variant in Thailand: A Nationwide Test-Negative Matched Case-Control Study
Source: MDPI journal article supplement (doi:10.3390/vaccines10071080), 2022-07-05
Supplement: s1 [file s1]

## Supplementary Material

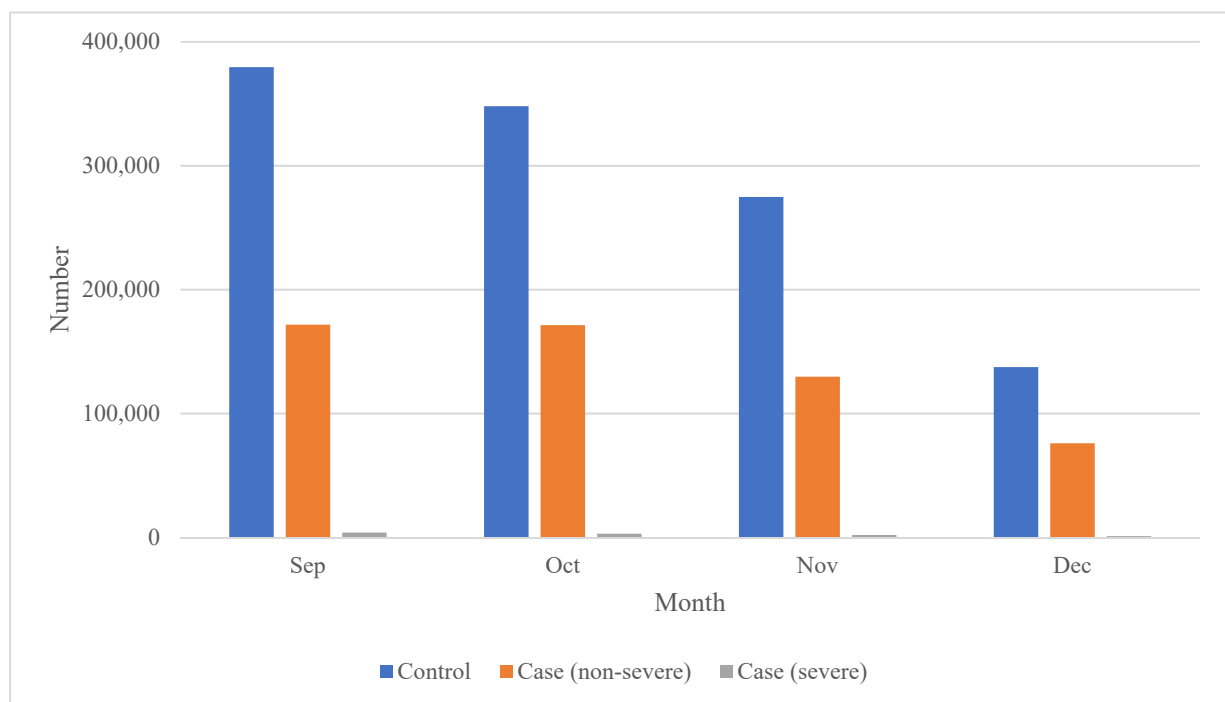

**Figure S1.** Number of cases and controls over months.

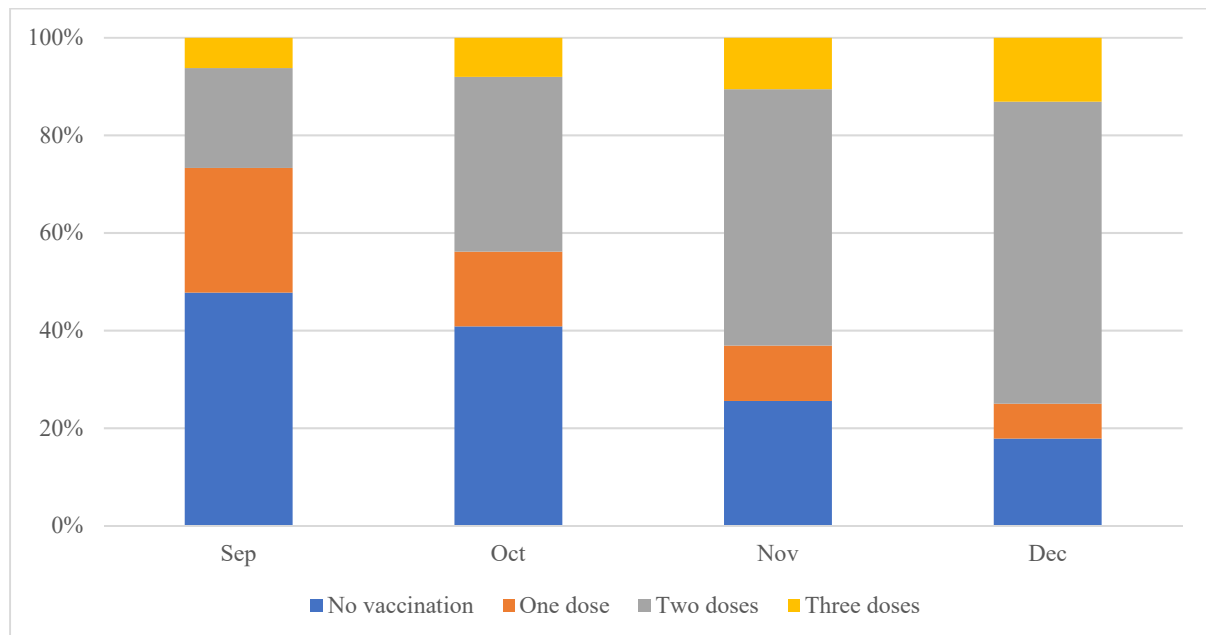

**Figure S2.** Proportion of each vaccination status over months.

**Table S1.** Descriptive statistics of the time lag between laboratory collection date and last vaccination date for the vaccinees whose laboratory collection date occurred at least 90 days after the last vaccination date.

| <b>Regimen</b> |                              | <b>Mean (standard deviation)</b> | <b>Median (P25, P75)</b> |
|----------------|------------------------------|----------------------------------|--------------------------|
| Two-dose       |                              |                                  |                          |
| •              | BNT162b2+BNT162b2            | 99 (7)                           | 98 (93, 104)             |
| •              | ChAdOx1+ChAdOx1              | 107 (19)                         | 101 (95, 112)            |
| •              | CoronaVac+CoronaVac          | 126 (18)                         | 122 (104, 142)           |
| •              | ChAdOx1+BNT162b2             | 107 (12)                         | 104 (96, 116)            |
| •              | CoronaVac+ChAdOx1            | 108 (15)                         | 105 (96, 117)            |
| •              | CoronaVac+BNT162b2           | 108 (15)                         | 105 (96, 118)            |
| Three-dose     |                              |                                  |                          |
| •              | CoronaVac+CoronaVac+ChAdOx1  | 116 (101, 133)                   | 118 (19)                 |
| •              | CoronaVac+CoronaVac+BNT162b2 | 108 (98, 122)                    | 110 (14)                 |
